# Supplementary material
Source: Royal Society of Chemistry journal article supplement (doi:10.1039/d6mh00079g)
Supplement: d6mh00079g1.pdf [file d6mh00079g1.pdf]

**Supporting Information for**  
**Giant thermal Hall effect in Topological Magnon Insulator Cr<sub>3</sub>Se<sub>4</sub>**  
**monolayer**

Zequn Zhang, Yingxi Bai, Baibiao Huang, Ying Dai,<sup>\*</sup> and Chengwang Niu<sup>†</sup>

*School of Physics, State Key Laboratory of Crystal Materials, Shandong University,*

*Jinan 250100, China*

\*Electronic address: [daiy60@sdu.edu.cn](mailto:daiy60@sdu.edu.cn)

†Electronic address: [c.niu@sdu.edu.cn](mailto:c.niu@sdu.edu.cn)

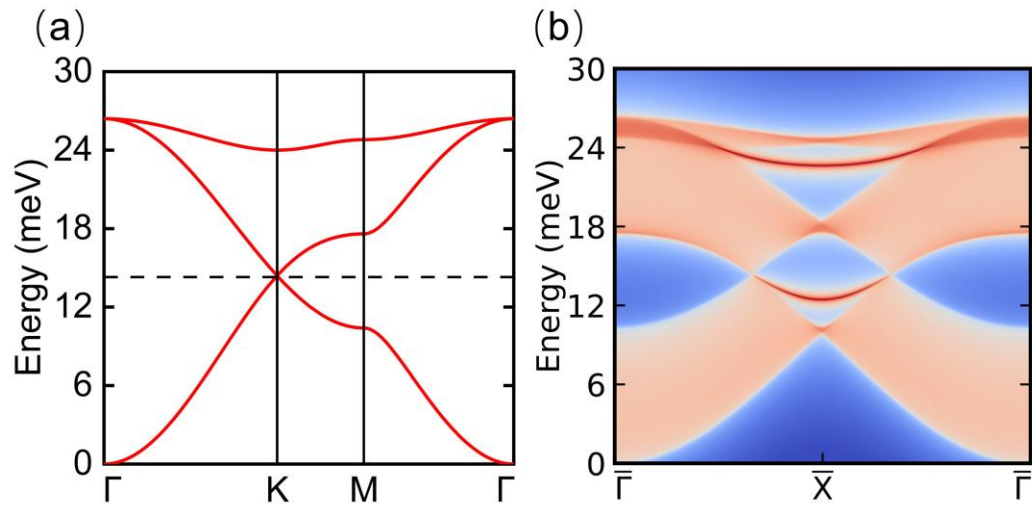

**Fig. S1.** (a) Magnonic band structure and (b) edge state of the Heisenberg-DM model with nearest and next-nearest neighbor DMI  $D_1 = 0$  and  $D_2 = 0$ .

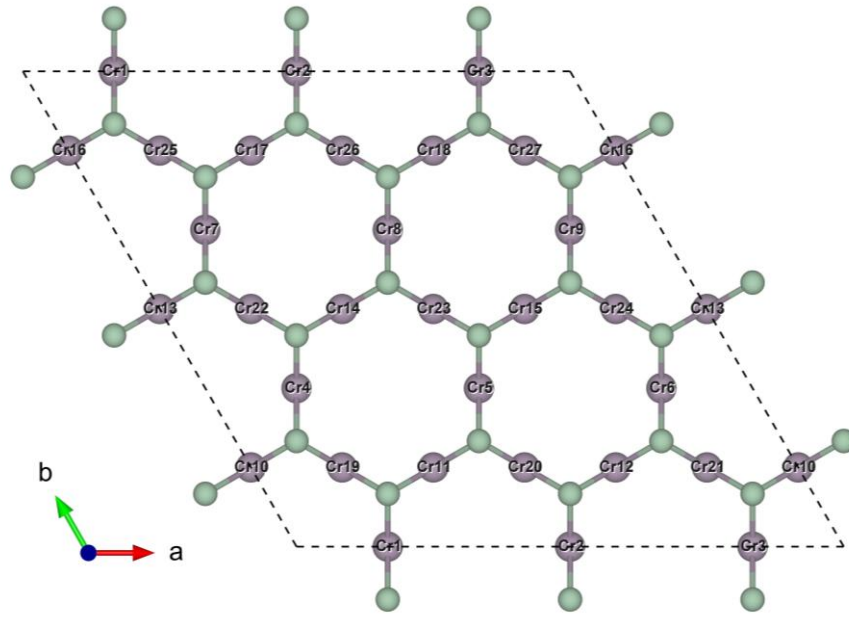

**Fig. S2.** Top view of the crystal structure of Cr<sub>3</sub>Se<sub>4</sub> monolayer. Each spin site is labeled with a number. The unit cell is marked with a dashed black line.

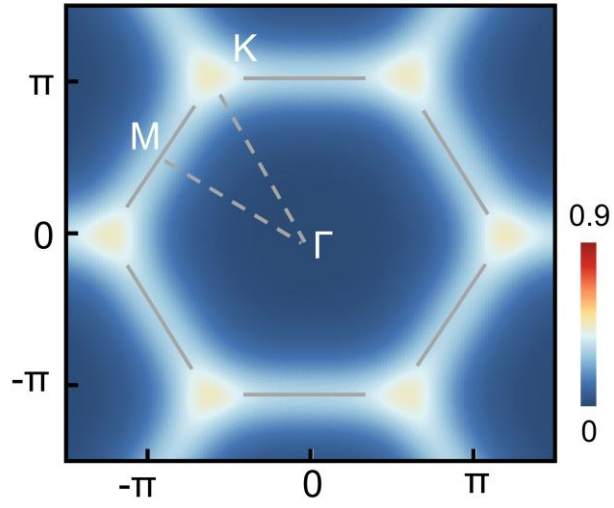

**Fig. S3.** K-space distribution of the Berry curvature within the nontrivial magnonic band gap of Cr<sub>3</sub>Se<sub>4</sub> monolayer.

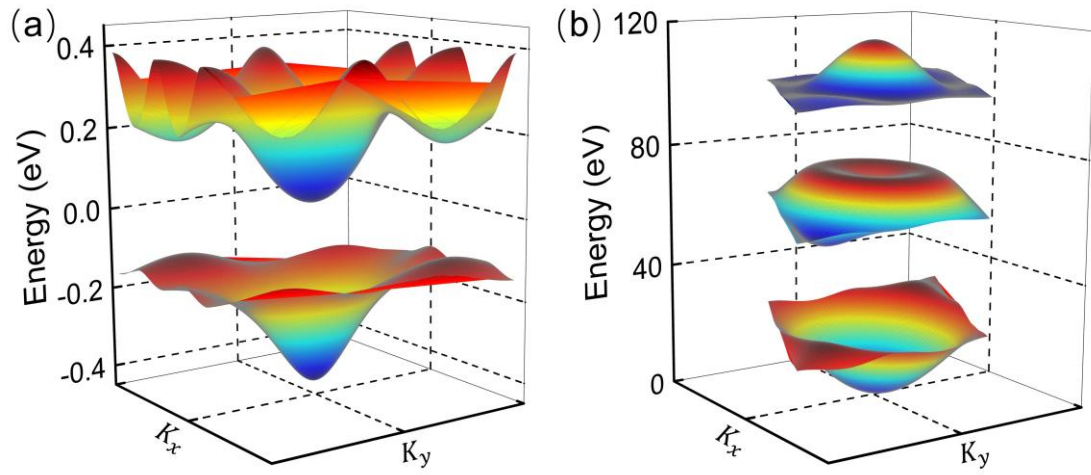

**Fig. S4.** Band structures of the entire Brillouin zone for Cr<sub>3</sub>Se<sub>4</sub> monolayer in (a) electronic and (b) magnonic systems.

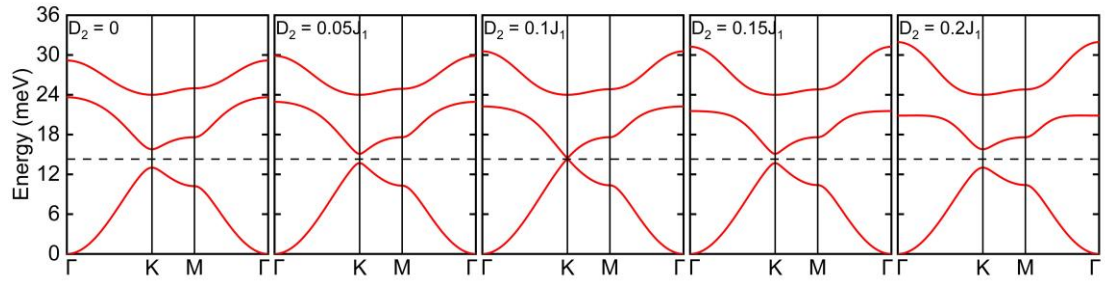

**Fig. S5.** Magnonic band structures of the Heisenberg-DM model with different NNN DMI  $D_2$ , where the NN DMI is set to  $D_1 = 0.2J_1$ .

## Note S1: Four-state methodology (4SM)

The magnetic exchange interaction  $J$  between two neighboring spins can be represented as

$$J_{ij} = \begin{pmatrix} J_{xx} & J_{xy} & J_{xz} \\ J_{yx} & J_{yy} & J_{yz} \\ J_{zx} & J_{zy} & J_{zz} \end{pmatrix},$$

and one can define  $J_{ij} = (J_{xx} + J_{yy} + J_{zz})/3$  and  $D_{ij}^z = (J_{xy} - J_{yx})/2$ . To calculate  $J_{xx}$ , we consider four magnetic states by setting the magnetic moments of two nearest neighboring magnetic atoms, while keeping the magnetic moments of other magnetic atoms as  $(0, 0, S)$ , and  $J_{xx} = \frac{E_1 + E_3 - E_2 - E_4}{4S^2}$ . Here  $E_1, E_2, E_3, E_4$  are the energy of four states, which are defined as follows:

$$\text{State 1 : } S_1 = (S, 0, 0), S_2 = (S, 0, 0),$$

$$\text{State 2 : } S_1 = (S, 0, 0), S_2 = (-S, 0, 0),$$

$$\text{State 3 : } S_1 = (-S, 0, 0), S_2 = (-S, 0, 0),$$

$$\text{State 4 : } S_1 = (-S, 0, 0), S_2 = (S, 0, 0).$$

This process provided all interaction parameters.

Table S1: Parameters of the Cr<sub>3</sub>Se<sub>4</sub> monolayer calculated by 4SM (meV).  $J_{xx}$ ,  $J_{yy}$ ,  $J_{zz}$ ,  $J_1$ , and  $D_{1z}$  represent the nearest-neighbor exchange parameters.  $J_2$  and  $D_{2z}$  represent the next nearest-neighbor exchange parameters, and  $A_z$  represents the single-ion anisotropy.

| strain | $J_{xx}$ | $J_{yy}$ | $J_{zz}$ | $J_1$  | $D_{1z}$ | $J_2$ | $D_{2z}$ | $A_z$  |
|--------|----------|----------|----------|--------|----------|-------|----------|--------|
| -2%    | -6.935   | -6.932   | -5.445   | -6.437 | -0.433   | 1.245 | -2.472   | -0.277 |
| 0      | -8.739   | -8.734   | -7.917   | -8.463 | -0.651   | 0.726 | -2.503   | -0.302 |
| 2%     | -9.684   | -9.675   | -9.513   | -9.624 | -0.877   | 0.437 | -2.440   | -0.382 |
